# Supplementary material for: Naja atra Cardiotoxin 3 Elicits Autophagy and Apoptosis in U937 Human Leukemia Cells through the Ca2+/PP2A/AMPK Axis
Source: PubMed Central journal article supplement (PMC6784133; doi:10.3390/toxins11090527), 2019-09-12
Supplement: toxins-11-00527-s001.pdf [file toxins-11-00527-s001.pdf]

## Supplementary Materials: *Naja atra* Cardiotoxin 3 Elicits Autophagy and Apoptosis in U937 Human Leukemia Cells through the Ca<sup>2+</sup>/PP2A/AMPK Axis

Jing-Ting Chiou, Yi-Jun Shi, Liang-Jun Wang, Chia-Hui Huang, Yuan-Chin Lee and Long-Sen Chang

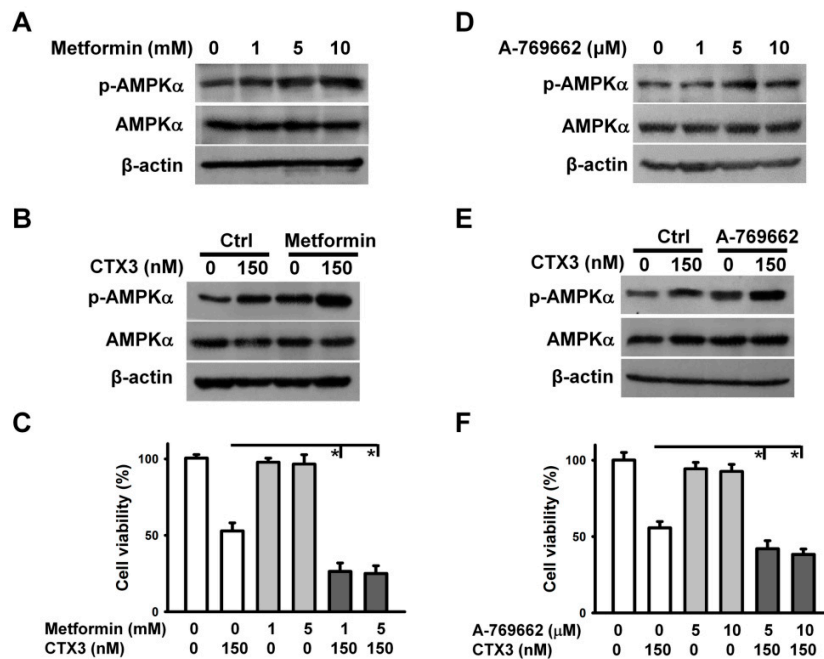

**Figure S1.** Effect of metformin and A-769662 on CTX3-induced cell death and AMPK $\alpha$  phosphorylation. Without specific indication, U937 cells were treated with 150 nM CTX3 for 4 h. (A) Effect of metformin on AMPK $\alpha$  phosphorylation in U937 cells. U937 cells were incubated with indicated metformin concentrations for 4 h; (B) Metformin enhanced CTX3-induced AMPK $\alpha$  phosphorylation. U937 cells were co-treated with 1 mM metformin and 150 nM CTX3 for 4 h; (C) Metformin enhanced CTX3-induced cell death. U937 cells were co-treated with indicated metformin and CTX3 concentrations for 4 h (mean  $\pm$  SD, \*  $p$  < 0.05); (D) Effect of A-769662 on AMPK $\alpha$  phosphorylation in U937 cells. U937 cells were incubated with indicated A-769662 concentrations for 4 h; (E) A-769662 enhanced CTX3-induced AMPK $\alpha$  phosphorylation. U937 cells were co-incubated with 5  $\mu$ M A-769662 and 150 nM CTX3 for 4 h; (F) A-769662 enhanced CTX3-induced cell death. U937 cells were incubated with indicated A-769662 and CTX3 concentrations for 4 h.

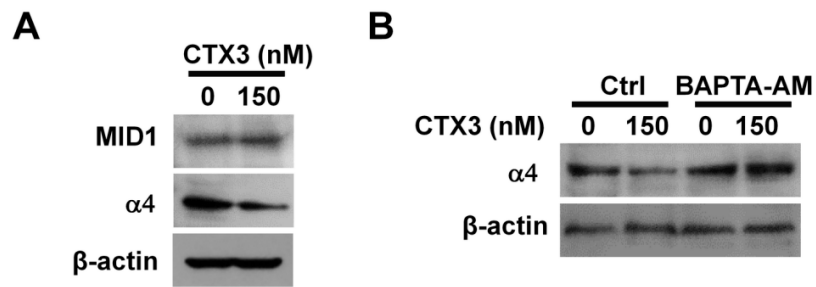

**Figure S2.** Effect of CTX3 on  $\alpha$ 4 and MID1 expression in CTX3-treated cells. Without specific indication, U937 cells were treated with 150 nM CTX3 for 4 h. On the other hand, U937 cells were pre-treated with 10  $\mu$ M BAPTA-AM for 1 h, and then incubated with 150 nM CTX3 for 4 h. (A) Western blot analyses of  $\alpha$ 4 and MID1 expression in CTX3-treated cells; (B) Effect of BAPTA-AM on  $\alpha$ 4 expression in CTX3-treated cells.
